# Supplementary figures and images for: Predictors and clinical outcomes of poor symptomatic improvement after transcatheter aortic valve replacement
Source: HighWire-hosted journal article supplement (doi:10.1136/openhrt-2021-001742), 2021-11-01

Supplemental Figure.tiff

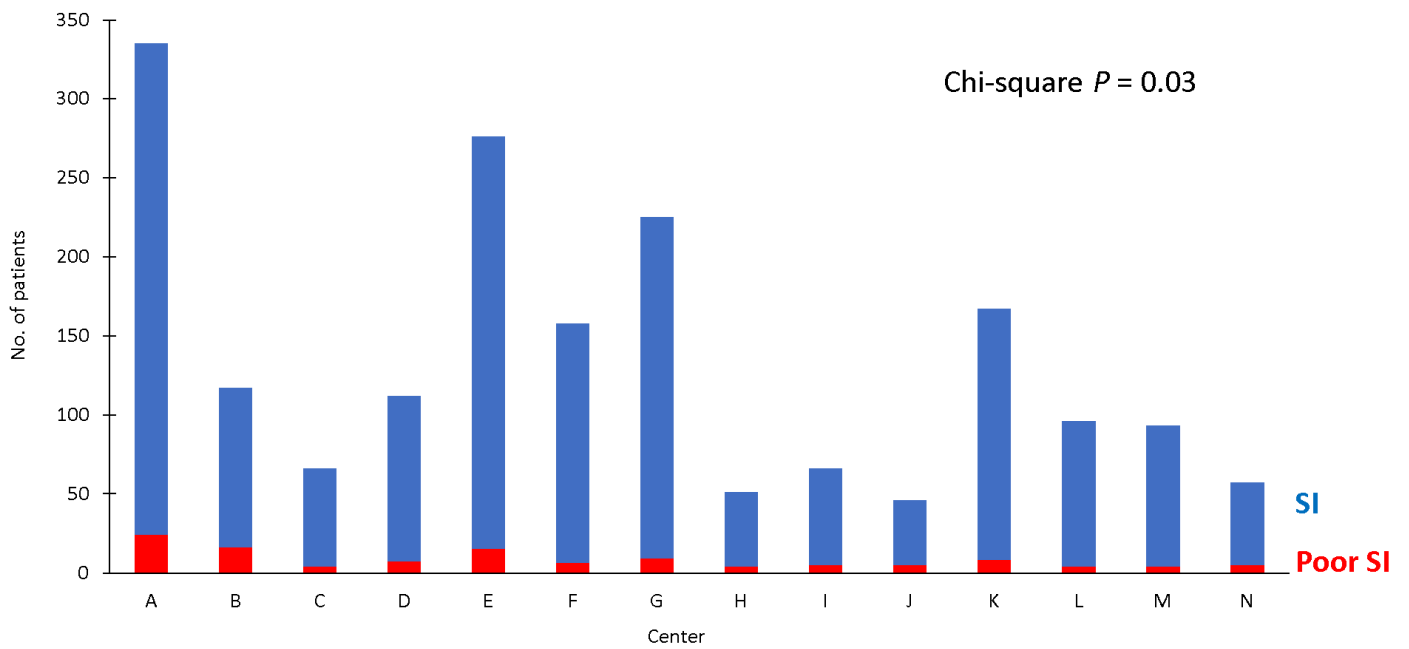

Supplement: openhrt-2021-001742supp001_data_supplement.pdf [file openhrt-2021-001742supp001_data_supplement.pdf]
